# Supplementary material for: Heterogeneous genetic diversity pattern in Plasmodium vivax genes encoding merozoite surface proteins (MSP) -7E, −7F and -7L
Source: PubMed Central journal article supplement (PMC4300842; doi:10.1186/1475-2875-13-495), 2014-12-13
Supplement: 12936_2014_3635_MOESM2_ESM.pdf [file 12936_2014_3635_MOESM2_ESM.pdf]

**Heterogeneous genetic diversity pattern in *Plasmodium vivax* genes encoding merozoite surface proteins (MSP) -7E, -7F and -7L**

**Additional file 2 Genetic distance between *pcmsp-7B*, *pcmsp-7E* and *pvmsp-7B*, *pvmsp-7E* sequences from 5 *P. vivax* isolates.**

| Sequence 1      | Sequence 2      | Dist  | Std. Err | Sequence 2    | Dist  | Std. Err |
|-----------------|-----------------|-------|----------|---------------|-------|----------|
|                 | <i>pcmsp-7E</i> | 0.202 | 0.011    | -             | -     | -        |
| <i>pcmsp-7B</i> | Sal-IB          | 0.216 | 0.011    | Sal-IE        | 0.282 | 0.014    |
|                 | Brazil-IB       | 0.216 | 0.011    | Brazil-IE     | 0.284 | 0.014    |
|                 | India-VIIB      | 0.216 | 0.011    | India-VIIE    | 0.279 | 0.013    |
|                 | Mauritania-IB   | 0.212 | 0.011    | Mauritania-IE | 0.281 | 0.014    |
|                 | North KoreanB   | 0.212 | 0.012    | North KoreanE | 0.296 | 0.014    |
| <i>pcmsp-7E</i> | Sal-IB          | 0.292 | 0.013    | Sal-IE        | 0.207 | 0.013    |
|                 | Brazil-IB       | 0.292 | 0.013    | Brazil-IE     | 0.214 | 0.013    |
|                 | India-VIIB      | 0.300 | 0.013    | India-VIIE    | 0.206 | 0.013    |
|                 | Mauritania-IB   | 0.285 | 0.014    | Mauritania-IE | 0.220 | 0.012    |
|                 | North KoreanB   | 0.307 | 0.015    | North KoreanE | 0.219 | 0.013    |
| Sal-IB          | Sal-IE          | 0.211 | 0.011    | -             | -     | -        |

The number of nucleotide differences per site was estimated as well as the standard error regarding the *pvmsp-7E* and *pvmsp-7B* reference sequences and the *pcmsp-7E* and *pcmsp-7B* sequences.
