# Supplementary material for: Heterogeneous genetic diversity pattern in Plasmodium vivax genes encoding merozoite surface proteins (MSP) -7E, −7F and -7L
Source: PubMed Central journal article supplement (PMC4300842; doi:10.1186/1475-2875-13-495), 2014-12-13
Supplement: 12936_2014_3635_MOESM3_ESM.pdf [file 12936_2014_3635_MOESM3_ESM.pdf]

**Heterogeneous genetic diversity pattern in *Plasmodium vivax* genes encoding merozoite surface proteins (MSP) -7E, -7F and -7L**

**Additional file 3 DNA polymorphism measurements at the 5'-end, central region and 3'-end for *pvmsp-7s* genes in the Colombian population.**

| n              | Gene           | Sites | Ss | S | Ps | H  | $\theta^w$ (se) | $\pi$ (se)      |
|----------------|----------------|-------|----|---|----|----|-----------------|-----------------|
| <b>5'-end</b>  |                |       |    |   |    |    |                 |                 |
| 31             | <i>m</i> sp-7E | 338   | 21 | 0 | 21 | 5  | 0.0155 (0.0034) | 0.0188 (0.0051) |
| 36             | <i>m</i> sp-7F | 360   | 0  | 0 | 0  | 1  | 0.000           | 0.000           |
| 31             | <i>m</i> sp-7L | 348   | 0  | 0 | 0  | 1  | 0.000           | 0.000           |
| <b>Central</b> |                |       |    |   |    |    |                 |                 |
| 31             | <i>m</i> sp-7E | 313   | 98 | 0 | 98 | 11 | 0.0760 (0.0077) | 0.1309 (0.0072) |
| 36             | <i>m</i> sp-7F | 429   | 1  | 0 | 1  | 2  | 0.0006 (0.0006) | 0.0008 (0.0002) |
| 31             | <i>m</i> sp-7L | 423   | 2  | 0 | 2  | 3  | 0.0012 (0.0008) | 0.0008 (0.0002) |
| <b>3'-end</b>  |                |       |    |   |    |    |                 |                 |
| 31             | <i>m</i> sp-7E | 393   | 45 | 6 | 39 | 14 | 0.0286 (0.0043) | 0.0295 (0.0052) |
| 36             | <i>m</i> sp-7F | 387   | 1  | 0 | 1  | 2  | 0.0006 (0.0006) | 0.0012 (0.0006) |
| 31             | <i>m</i> sp-7L | 444   | 2  | 0 | 2  | 3  | 0.0011 (0.0008) | 0.0009 (0.0002) |

Ss: number of segregating sites, S: number of singleton sites, Ps: number of parsimony-informative sites, H: number of haplotypes,  $\theta^w$ : Watterson estimator,  $\pi$ : nucleotide diversity. (sd): standard deviation. 5'-end (*pvmsp-7E*: nucleotide 1–390, *pvmsp-7F*: nucleotide 1–432, *pvmsp-7L*: nucleotide 1–381), central (*pvmsp-7E*: nucleotide 391–747, *pvmsp-7F*: nucleotide 433–1,053, *pvmsp-7L*: nucleotide 382–816) and 3'-end (*pvmsp-7E*: nucleotide 748–1,158, *pvmsp-7F*: nucleotide 1,054–1,449, *pvmsp-7L*: nucleotide 817–1,275). Numbers based on Additional files 4, 9 and 10.
