# Supplementary material for: Heterogeneous genetic diversity pattern in Plasmodium vivax genes encoding merozoite surface proteins (MSP) -7E, −7F and -7L
Source: PubMed Central journal article supplement (PMC4300842; doi:10.1186/1475-2875-13-495), 2014-12-13
Supplement: 12936_2014_3635_MOESM4_ESM.pdf [file 12936_2014_3635_MOESM4_ESM.pdf]

Additional file 4 *pvmsp-7E* gene alignment.

```

1
#Haplotype_1 ATG AAA GGA GTC ACT GGG CCG ATC TGT TGT CTT TTC CTG TTT CTG TTC AGC TGC GCG TCG TCG GAA AAG TTG GGC GTC CAG AAA AAG AAA AAA AAT CTG GAG CAG GAC GCG ACG CAC GCG
#Haplotype_2 ...
#Haplotype_3 ...
#Haplotype_4 ...G...C...T...
#Haplotype_5 ...
#Haplotype_6 ...
#Haplotype_7 ...
#Haplotype_8 ...
#Haplotype_9 ...
#Haplotype_10 ...
#Haplotype_11 ...
#Haplotype_12 ...
#Haplotype_13 ...
#Haplotype_14 ...
#Haplotype_15 ...
#Haplotype_16 ...
#Haplotype_17 ...
#Haplotype_18 ...
#Haplotype_19 ...
#Haplotype_20 ...
#Haplotype_21 ...
#Haplotype_22 ...
#Haplotype_23 ...
#P_cynomolgi ...G.A.A.A..T...G...T...AC...T.G...T...

121
#Haplotype_1 TTG ATG AAG AAG TTG GAA AGT CTG TAC AAA CTC AGT GCA ACG GAC AAC AGC GAA ATT TTT AAC AAA GAA ATT GAG TCG TTG AAA AAG CAG ATT GAT CAG TTG CAC CAA CAT GGT GGG GAA
#Haplotype_2 ...
#Haplotype_3 ...
#Haplotype_4 ...G...T...G...C...G...H...G...C...
#Haplotype_5 ...
#Haplotype_6 ...
#Haplotype_7 ...
#Haplotype_8 ...G...C...G...G...C...
#Haplotype_9 ...
#Haplotype_10 ...
#Haplotype_11 ...
#Haplotype_12 ...G...T...G...C...G...H...G...C...
#Haplotype_13 ...
#Haplotype_14 ...G...T...G...C...G...H...G...C...
#Haplotype_15 ...
#Haplotype_16 ...
#Haplotype_17 ...G...T...G...C...G...H...G...C...
#Haplotype_18 ...
#Haplotype_19 ...
#Haplotype_20 ...
#Haplotype_21 ...
#Haplotype_22 ...
#Haplotype_23 ...
#P_cynomolgi ...C...A...T...G...C...G...A.T...G...G...A...C...A...T...

```

241

```

#Haplotype_1 AAC GAA GGG GAG AGT TTA GGC CAC CTT CTA GAA AGC GAG GCC GCC AAT GAG TCA GCC AAA AAG ACC ATT TTT GGA GTG GAC GAA GAC GAT TTA GAT AAC TAC GAC GCG GAC TTC ATT GGA
#Haplotype_2 .....
#Haplotype_3 .....
#Haplotype_4 .....A.....
#Haplotype_5 .....
#Haplotype_6 .....
#Haplotype_7 .....
#Haplotype_8 .....A.....
#Haplotype_9 .....
#Haplotype_10 .....
#Haplotype_11 .....
#Haplotype_12 .....A.....
#Haplotype_13 .....A.....
#Haplotype_14 .....A.....
#Haplotype_15 .....
#Haplotype_16 .....
#Haplotype_17 .....A.....
#Haplotype_18 .....
#Haplotype_19 .....
#Haplotype_20 .....
#Haplotype_21 .....
#Haplotype_22 .....
#Haplotype_23 .....
#P_cynomolgi .T.....A.A.C...T.....A.A...C.....A...G.....C..C.A...T..C.G.....T.T...T.CA...

```

361

```

#Haplotype_1 CAG AGC AAA GGC AAA ATT AAG GGG CAA GCG GAT ACA GAC AAC CAA GCT CAG AGA --- ACT GCT GAC GTG GCG GCC CAA CCC GGG GGT GTA TCA CCT TCT ACG AGT GCC CGA CCA CAG GAA
#Haplotype_2 .....
#Haplotype_3 .....A...G..G..G..G.T..GC..A.....AGC C...G..C..G...A...A.....
#Haplotype_4 .....A.A...A.....T..G...T..G...GCT C...AC A..T..C...G..C..AA.....C...A..T..T..G..G...GG.A.....
#Haplotype_5 .....
#Haplotype_6 .....
#Haplotype_7 .....
#Haplotype_8 .....A.A...A.....T..G...T..G...GCT C...AC A..T..C...G..C..AA.....C...A..T..T..G..G...GG.A.....
#Haplotype_9 .....A...G..G..G..G.T..GC..A.....AGC C...G..C..G...A...A.....
#Haplotype_10 .....
#Haplotype_11 .....
#Haplotype_12 .....A.A...A.....T..G...T..G...GCT C...AC A..T..C...G..C..AA...C.C..A..T..T..G..G...GG.A.....
#Haplotype_13 .....A.A...A.....T..G...T..G...GCT C...AC A..T..C...G..C..AA...C...A..T..T..G..G...GG.A.....
#Haplotype_14 .....A.A...A.....T..G...T..G...GCT C...AC A..T..C...G..C..AA...C...A..T..T..G..G...GG.A.....
#Haplotype_15 .....
#Haplotype_16 .....
#Haplotype_17 .....A...G..G..G..G.T..GC..A.....AGC C...G..C..G...A...A.....
#Haplotype_18 .....
#Haplotype_19 .....A...G..G..G..G.T..GC..A.....AGC C...G..C..G...A...A.....
#Haplotype_20 .....
#Haplotype_21 .....
#Haplotype_22 .....
#Haplotype_23 .....
#P_cynomolgi ...G...A...A...A...G.C.G.GCC...GA.ACT...GC.A..T...G...G...A.G...A.G...T..GA..G..G..G..A..A...C..

```

480





|               | 961 |     |     |     |     |     |     |     |     |     |     |     |     |     |     |     |     |     |     |     |     |     |     |     |     |     | 1080 |     |     |     |     |     |     |     |     |     |     |     |     |     |  |  |    |  |  |  |  |  |  |  |  |  | 1167 |  |  |  |  |  |  |  |  |  |  |  |  |  |  |  |  |  |  |  |  |  |  |  |  |  |
|---------------|-----|-----|-----|-----|-----|-----|-----|-----|-----|-----|-----|-----|-----|-----|-----|-----|-----|-----|-----|-----|-----|-----|-----|-----|-----|-----|------|-----|-----|-----|-----|-----|-----|-----|-----|-----|-----|-----|-----|-----|--|--|----|--|--|--|--|--|--|--|--|--|------|--|--|--|--|--|--|--|--|--|--|--|--|--|--|--|--|--|--|--|--|--|--|--|--|--|
| #Haplotype_1  | TCT | TCA | GAT | GCT | ACT | CCC | CTA | GTT | GAC | GTT | TTT | AAA | AAA | GCG | TTA | GCT | GAC | GAG | ACA | TTT | CAA | GCC | GAG | TTT | GAT | AAC | TTT  | GTA | CAT | GGG | CTG | TAC | GGA | TTT | GCT | AAA | AGG | CAT | AAC | TAC |  |  |    |  |  |  |  |  |  |  |  |  |      |  |  |  |  |  |  |  |  |  |  |  |  |  |  |  |  |  |  |  |  |  |  |  |  |  |
| #Haplotype_2  | .A  | G.T | .C. | ... | T.C | --- | .G  | ... |     |     |     |     |     |     |     |     | .G  | ... |     |     |     |     |     |     |     |     |      |     |     |     |     |     |     |     |     |     |     |     |     |     |  |  |    |  |  |  |  |  |  |  |  |  |      |  |  |  |  |  |  |  |  |  |  |  |  |  |  |  |  |  |  |  |  |  |  |  |  |  |
| #Haplotype_3  | .A  | G.T | .C. | ... | T.C | --- | .G  | ... |     |     |     |     |     |     |     |     | .G  | ... |     |     |     |     |     |     |     |     |      |     |     |     |     |     |     |     |     |     |     |     |     |     |  |  |    |  |  |  |  |  |  |  |  |  |      |  |  |  |  |  |  |  |  |  |  |  |  |  |  |  |  |  |  |  |  |  |  |  |  |  |
| #Haplotype_4  | .A  | G.T | .C. | ... | T.C | --- | .G  | ... |     |     |     |     |     |     |     |     | .G  | ... |     |     |     |     |     |     |     |     |      |     |     |     |     |     |     |     |     |     |     |     |     |     |  |  |    |  |  |  |  |  |  |  |  |  |      |  |  |  |  |  |  |  |  |  |  |  |  |  |  |  |  |  |  |  |  |  |  |  |  |  |
| #Haplotype_5  | ... |     |     |     |     |     |     |     |     |     |     |     |     |     |     |     | ... |     |     |     |     |     |     |     |     |     |      |     |     |     |     |     |     |     |     |     |     |     |     |     |  |  |    |  |  |  |  |  |  |  |  |  |      |  |  |  |  |  |  |  |  |  |  |  |  |  |  |  |  |  |  |  |  |  |  |  |  |  |
| #Haplotype_6  | ... |     |     |     |     |     |     |     |     |     |     |     |     |     |     |     | ... |     |     |     |     |     |     |     |     |     |      |     |     |     |     |     |     |     |     |     |     |     |     |     |  |  |    |  |  |  |  |  |  |  |  |  |      |  |  |  |  |  |  |  |  |  |  |  |  |  |  |  |  |  |  |  |  |  |  |  |  |  |
| #Haplotype_7  | ... |     |     |     |     |     |     |     |     |     |     |     |     |     |     |     | ... |     |     |     |     |     |     |     |     |     |      |     |     |     |     |     |     |     |     |     |     |     |     |     |  |  |    |  |  |  |  |  |  |  |  |  |      |  |  |  |  |  |  |  |  |  |  |  |  |  |  |  |  |  |  |  |  |  |  |  |  |  |
| #Haplotype_8  | .A  | G.T | .C. | ... | T.C | --- | .G  | ... |     |     |     |     |     |     |     |     | .G  | ... |     |     |     |     |     |     |     |     |      |     |     |     |     |     |     |     |     |     |     |     |     |     |  |  |    |  |  |  |  |  |  |  |  |  |      |  |  |  |  |  |  |  |  |  |  |  |  |  |  |  |  |  |  |  |  |  |  |  |  |  |
| #Haplotype_9  | ... |     |     |     |     |     |     |     |     |     |     |     |     |     |     |     | ... |     |     |     |     |     |     |     |     |     |      |     |     |     |     |     |     |     |     |     |     |     |     |     |  |  |    |  |  |  |  |  |  |  |  |  |      |  |  |  |  |  |  |  |  |  |  |  |  |  |  |  |  |  |  |  |  |  |  |  |  |  |
| #Haplotype_10 | ... |     |     |     |     |     |     |     |     |     |     |     |     |     |     |     | ... |     |     |     |     |     |     |     |     |     |      |     |     |     |     |     |     |     |     |     |     |     |     |     |  |  |    |  |  |  |  |  |  |  |  |  |      |  |  |  |  |  |  |  |  |  |  |  |  |  |  |  |  |  |  |  |  |  |  |  |  |  |
| #Haplotype_11 | ... |     |     |     |     |     |     |     |     |     |     |     |     |     |     |     | ... |     |     |     |     |     |     |     |     |     |      |     |     |     |     |     |     |     |     |     |     |     |     |     |  |  |    |  |  |  |  |  |  |  |  |  |      |  |  |  |  |  |  |  |  |  |  |  |  |  |  |  |  |  |  |  |  |  |  |  |  |  |
| #Haplotype_12 | .A  | G.T | .C. | ... | T.C | --- | .G  | ... |     |     |     |     |     |     |     |     | .G  | ... |     |     |     |     |     |     |     |     |      |     |     |     |     |     |     |     |     |     |     |     |     |     |  |  |    |  |  |  |  |  |  |  |  |  |      |  |  |  |  |  |  |  |  |  |  |  |  |  |  |  |  |  |  |  |  |  |  |  |  |  |
| #Haplotype_13 | .A  | G.T | .C. | ... | T.C | --- | .G  | ... |     |     |     |     |     |     |     |     | .G  | ... |     |     |     |     |     |     |     |     |      |     |     |     |     |     |     |     |     |     |     |     |     |     |  |  |    |  |  |  |  |  |  |  |  |  |      |  |  |  |  |  |  |  |  |  |  |  |  |  |  |  |  |  |  |  |  |  |  |  |  |  |
| #Haplotype_14 | .A  | G.T | .C. | ... | T.C | --- | .G  | ... |     |     |     |     |     |     |     |     | .G  | ... |     |     |     |     |     |     |     |     |      |     |     |     |     |     |     |     |     |     |     |     |     |     |  |  |    |  |  |  |  |  |  |  |  |  |      |  |  |  |  |  |  |  |  |  |  |  |  |  |  |  |  |  |  |  |  |  |  |  |  |  |
| #Haplotype_15 | ... |     |     |     |     |     |     |     |     |     |     |     |     |     |     |     | ... |     |     |     |     |     |     |     |     |     |      |     |     |     |     |     |     |     |     |     |     |     |     |     |  |  |    |  |  |  |  |  |  |  |  |  |      |  |  |  |  |  |  |  |  |  |  |  |  |  |  |  |  |  |  |  |  |  |  |  |  |  |
| #Haplotype_16 | .A  | G.T | .C. | ... | T.C | --- | .G  | ... |     |     |     |     |     |     |     |     | .A  | ... |     |     |     |     |     |     |     |     |      |     |     |     |     |     |     |     |     |     |     |     |     |     |  |  |    |  |  |  |  |  |  |  |  |  |      |  |  |  |  |  |  |  |  |  |  |  |  |  |  |  |  |  |  |  |  |  |  |  |  |  |
| #Haplotype_17 | .A  | G.T | .C. | ... | T.C | --- | .G  | ... |     |     |     |     |     |     |     |     | .A  | ... |     |     |     |     |     |     |     |     |      |     |     |     |     |     |     |     |     |     |     |     |     |     |  |  |    |  |  |  |  |  |  |  |  |  |      |  |  |  |  |  |  |  |  |  |  |  |  |  |  |  |  |  |  |  |  |  |  |  |  |  |
| #Haplotype_18 | ... |     |     |     |     |     |     |     |     |     |     |     |     |     |     |     | ... |     |     |     |     |     |     |     |     |     |      |     |     |     |     |     |     |     |     |     |     |     |     |     |  |  |    |  |  |  |  |  |  |  |  |  |      |  |  |  |  |  |  |  |  |  |  |  |  |  |  |  |  |  |  |  |  |  |  |  |  |  |
| #Haplotype_19 | ... |     |     |     |     |     |     |     |     |     |     |     |     |     |     |     | ... |     |     |     |     |     |     |     |     |     |      |     |     |     |     |     |     |     |     |     |     |     |     |     |  |  |    |  |  |  |  |  |  |  |  |  |      |  |  |  |  |  |  |  |  |  |  |  |  |  |  |  |  |  |  |  |  |  |  |  |  |  |
| #Haplotype_20 | .A  | G.T | .C. | ... | T.C | --- | .G  | ... |     |     |     |     |     |     |     |     | .A  | ... |     |     |     |     |     |     |     |     |      |     |     |     |     |     |     |     |     |     |     |     |     |     |  |  |    |  |  |  |  |  |  |  |  |  |      |  |  |  |  |  |  |  |  |  |  |  |  |  |  |  |  |  |  |  |  |  |  |  |  |  |
| #Haplotype_21 | ... |     |     |     |     |     |     |     |     |     |     |     |     |     |     |     | ... |     |     |     |     |     |     |     |     |     |      |     |     |     |     |     |     |     |     |     |     |     |     |     |  |  |    |  |  |  |  |  |  |  |  |  |      |  |  |  |  |  |  |  |  |  |  |  |  |  |  |  |  |  |  |  |  |  |  |  |  |  |
| #Haplotype_22 | .A  | G.T | .C. | ... | T.C | --- | .G  | ... |     |     |     |     |     |     |     |     | .A  | ... |     |     |     |     |     |     |     |     |      |     |     |     |     |     |     |     |     |     |     |     |     |     |  |  |    |  |  |  |  |  |  |  |  |  |      |  |  |  |  |  |  |  |  |  |  |  |  |  |  |  |  |  |  |  |  |  |  |  |  |  |
| #Haplotype_23 | ... |     |     |     |     |     |     |     |     |     |     |     |     |     |     |     | ... |     |     |     |     |     |     |     |     |     |      |     |     |     |     |     |     |     |     |     |     |     |     |     |  |  |    |  |  |  |  |  |  |  |  |  |      |  |  |  |  |  |  |  |  |  |  |  |  |  |  |  |  |  |  |  |  |  |  |  |  |  |
| #P_cynomolgi  | .A  | G.T | .C. | AA. | T.C | --- | .G  | ACG | .A  |     |     |     |     |     | .TC | .TA | .T  | .A  | .A  |     |     |     | .A  | .A  | A.C |     |      | .G  | .C  |     |     |     |     | .T  |     |     | .G  | .A  | .C  |     |  |  | .T |  |  |  |  |  |  |  |  |  |      |  |  |  |  |  |  |  |  |  |  |  |  |  |  |  |  |  |  |  |  |  |  |  |  |  |

  

|               |     |     |     |     |     |     |     |     |     |      |     |     |     |     |     |     |     |     |     |     |     |     |     |     |     |     |     |     |     |     |     |  |  |  |  |  |  |  |  |  |  |  |  |  |  |  |
|---------------|-----|-----|-----|-----|-----|-----|-----|-----|-----|------|-----|-----|-----|-----|-----|-----|-----|-----|-----|-----|-----|-----|-----|-----|-----|-----|-----|-----|-----|-----|-----|--|--|--|--|--|--|--|--|--|--|--|--|--|--|--|
| #Haplotype_1  | CTA | AGT | GAG | GCG | CGG | ATG | AAG | GAT | GCT | GAT  | CGC | TAC | ACC | AAT | CTG | CTA | AAG | AAC | GCC | ATC | AGC | TTG | ATG | TAC | ACC | ATT | --- | --- | --- | --- | --- |  |  |  |  |  |  |  |  |  |  |  |  |  |  |  |
| #Haplotype_2  | ... |     |     |     |     |     |     | .G  | ... |      |     |     |     |     |     |     |     |     |     |     |     |     |     |     |     |     |     |     |     |     |     |  |  |  |  |  |  |  |  |  |  |  |  |  |  |  |
| #Haplotype_3  | ... |     |     |     |     |     |     |     |     |      |     |     |     |     |     |     |     |     |     |     |     |     |     |     |     |     |     |     |     |     |     |  |  |  |  |  |  |  |  |  |  |  |  |  |  |  |
| #Haplotype_4  | ... |     |     |     |     |     |     |     |     |      |     |     |     |     |     |     |     |     |     |     |     |     |     |     |     |     |     |     |     |     |     |  |  |  |  |  |  |  |  |  |  |  |  |  |  |  |
| #Haplotype_5  | ... |     |     |     |     |     |     |     |     |      |     |     |     |     |     |     |     |     |     |     |     |     |     |     |     |     |     |     |     |     |     |  |  |  |  |  |  |  |  |  |  |  |  |  |  |  |
| #Haplotype_6  | ... |     |     |     |     |     |     |     |     |      |     |     |     |     |     |     |     |     |     |     |     |     |     |     |     |     |     |     |     |     |     |  |  |  |  |  |  |  |  |  |  |  |  |  |  |  |
| #Haplotype_7  | ... |     |     |     |     |     |     |     |     |      |     |     |     |     |     |     |     |     |     |     |     |     |     |     |     |     |     |     |     |     |     |  |  |  |  |  |  |  |  |  |  |  |  |  |  |  |
| #Haplotype_8  | ... |     |     |     |     |     |     |     |     |      |     |     |     |     |     |     |     |     |     |     |     |     |     |     |     |     |     |     |     |     |     |  |  |  |  |  |  |  |  |  |  |  |  |  |  |  |
| #Haplotype_9  | ... |     |     |     |     |     |     |     |     |      |     |     |     |     |     |     |     |     |     |     |     |     |     |     |     |     |     |     |     |     |     |  |  |  |  |  |  |  |  |  |  |  |  |  |  |  |
| #Haplotype_10 | ... |     |     |     |     |     |     |     |     |      |     |     |     |     |     |     |     |     |     |     |     |     |     |     |     |     |     |     |     |     |     |  |  |  |  |  |  |  |  |  |  |  |  |  |  |  |
| #Haplotype_11 | ... |     |     |     |     |     |     |     |     |      |     |     |     |     |     |     |     |     |     |     |     |     |     |     |     |     |     |     |     |     |     |  |  |  |  |  |  |  |  |  |  |  |  |  |  |  |
| #Haplotype_12 | ... |     |     |     |     |     |     |     |     |      |     |     |     |     |     |     |     |     |     |     |     |     |     |     |     |     |     |     |     |     |     |  |  |  |  |  |  |  |  |  |  |  |  |  |  |  |
| #Haplotype_13 | ... |     |     |     |     |     |     |     |     |      |     |     |     |     |     |     |     |     |     |     |     |     |     |     |     |     |     |     |     |     |     |  |  |  |  |  |  |  |  |  |  |  |  |  |  |  |
| #Haplotype_14 | ... |     |     |     |     |     |     |     |     |      |     |     |     |     |     |     |     |     |     |     |     |     |     |     |     |     |     |     |     |     |     |  |  |  |  |  |  |  |  |  |  |  |  |  |  |  |
| #Haplotype_15 | ... |     |     |     |     |     |     |     |     |      |     |     |     |     |     |     |     |     |     |     |     |     |     |     |     |     |     |     |     |     |     |  |  |  |  |  |  |  |  |  |  |  |  |  |  |  |
| #Haplotype_16 | T   |     |     | .A  | .A  |     |     | .C  | AA  | .A.A | T   |     | T   | G   | T   | .G  | .A  |     |     |     |     |     |     |     |     |     |     |     |     |     |     |  |  |  |  |  |  |  |  |  |  |  |  |  |  |  |
| #Haplotype_17 | ... |     |     |     |     |     |     | .C  |     |      |     |     |     |     |     |     |     |     |     |     |     |     |     |     |     |     |     |     |     |     |     |  |  |  |  |  |  |  |  |  |  |  |  |  |  |  |
| #Haplotype_18 | ... |     |     |     |     |     |     | .C  |     |      |     |     |     |     |     |     |     |     |     |     |     |     |     |     |     |     |     |     |     |     |     |  |  |  |  |  |  |  |  |  |  |  |  |  |  |  |
| #Haplotype_19 | ... |     |     |     |     |     |     | .C  |     |      |     |     |     |     |     |     |     |     |     |     |     |     |     |     |     |     |     |     |     |     |     |  |  |  |  |  |  |  |  |  |  |  |  |  |  |  |
| #Haplotype_20 | T   |     |     | .A  | .A  |     |     | .C  | AA  | .A.A | T   |     | T   | G   | T   | .G  | .A  |     |     |     |     |     |     |     |     |     |     |     |     |     |     |  |  |  |  |  |  |  |  |  |  |  |  |  |  |  |
| #Haplotype_21 | ... |     |     |     |     |     |     | .C  |     |      |     |     |     |     |     |     |     |     |     |     |     |     |     |     |     |     |     |     |     |     |     |  |  |  |  |  |  |  |  |  |  |  |  |  |  |  |
| #Haplotype_22 | ... |     |     |     |     |     |     | .C  |     |      |     |     |     |     |     |     |     |     |     |     |     |     |     |     |     |     |     |     |     |     |     |  |  |  |  |  |  |  |  |  |  |  |  |  |  |  |
| #Haplotype_23 | ... |     |     |     |     |     |     | .C  |     |      |     |     |     |     |     |     |     |     |     |     |     |     |     |     |     |     |     |     |     |     |     |  |  |  |  |  |  |  |  |  |  |  |  |  |  |  |
| #P_cynomolgi  | T   | G   | .A  | T   | AAA | .A  | C   | T   | G   | .A   | C   | A   | G   | ACA | GT  | G   | .T  | G   |     |     |     |     |     |     |     |     |     |     |     |     |     |  |  |  |  |  |  |  |  |  |  |  |  |  |  |  |

The alignment shows the 23 haplotypes found in *pvm*sp-7*E* together with the *pc*msp-7*E* haplotype. Haplotype 1, Sal-I; Haplotype 2, Brazil-I; Haplotype 3, India-VII; Haplotype 4, Mauritania-I; Haplotype 5-23, Colombian isolates. Dots represent nucleotide identity. Codons under positive selection are shown in green (intra-species) and turquoise (inter-species) and those under negative selection are shown in yellow (intra-species) and fuchsia (inter-species).
