# Supplementary material for: Heterogeneous genetic diversity pattern in Plasmodium vivax genes encoding merozoite surface proteins (MSP) -7E, −7F and -7L
Source: PubMed Central journal article supplement (PMC4300842; doi:10.1186/1475-2875-13-495), 2014-12-13
Supplement: 12936_2014_3635_MOESM5_ESM.pdf [file 12936_2014_3635_MOESM5_ESM.pdf]

# Heterogeneous genetic diversity pattern in *Plasmodium vivax* genes encoding merozoite surface proteins (MSP) -7E, -7F and -7L

## Additional file 5 Haplotype alignment at *pvmsp-7E* protein level in Colombia.

|              | 18         |            |            |            |            |            |            |            |            |            |            |          | 135   |
|--------------|------------|------------|------------|------------|------------|------------|------------|------------|------------|------------|------------|----------|-------|
| Haplotype_5  | CASSEKLGVQ | KKKKNLEQDA | THALMKKLES | LYKLSATDNS | EIFNKEIESL | KKQIDQLHQH | GGENEGESLG | HLESEEAANE | SAKKTIFGVD | EDDLLNYDAD | FIGQSKGKIK | GQADTDNQ |       |
| Haplotype_7  | .....      | .....      | .....      | .....      | .....      | .....      | .....      | .....      | .....      | .....      | .....      | .....    | ..... |
| Haplotype_8  | .....      | .R.....    | .....      | .....      | .....      | .....      | .....      | .....      | .....      | .....      | .....      | .....    | ..... |
| Haplotype_9  | .....      | .....      | .....      | .....      | .....      | .....      | .....      | .....      | .....      | .....      | .....      | .....    | ..... |
| Haplotype_10 | .....      | .....      | .....      | .....      | .....      | .....      | .....      | .....      | .....      | .....      | .....      | .....    | ..... |
| Haplotype_11 | .....      | .....      | .....      | .....      | .....      | .....      | .....      | .....      | .....      | .....      | .....      | .....    | ..... |
| Haplotype_14 | .....      | .R.....    | .....      | .....      | .....      | .....      | .....      | .....      | .....      | .....      | .....      | .....    | ..... |
| Haplotype_16 | .....      | .....      | .....      | .....      | .....      | .....      | .....      | .....      | .....      | .....      | .....      | .....    | ..... |
| Haplotype_17 | .....      | .R.....    | .....      | .....      | .....      | .....      | .....      | .....      | .....      | .....      | .....      | .....    | ..... |
| Haplotype_18 | .....      | .....      | .....      | .....      | .....      | .....      | .....      | .....      | .....      | .....      | .....      | .....    | ..... |
| Haplotype_20 | .....      | .....      | .....      | .....      | .....      | .....      | .....      | .....      | .....      | .....      | .....      | .....    | ..... |
| Haplotype_22 | .....      | .....      | .....      | .....      | .....      | .....      | .....      | .....      | .....      | .....      | .....      | .....    | ..... |
| Haplotype_23 | .....      | .....      | .....      | .....      | .....      | .....      | .....      | .....      | .....      | .....      | .....      | .....    | ..... |
|              | 136        |            |            |            |            |            |            |            |            |            |            |          | 264   |
| Haplotype_5  | AQ-RTADVAA | QPGGVSPSTS | ARQEPGKGTG | VTGSPNGLVE | AGLVNTKTLQ | NVGPNGORAA | DPQPGRAANL | PEGQRTNDPQ | Q--GGSESTE | GPAVTPRPSS | TVTPSDANDA | KIKYLDKL |       |
| Haplotype_7  | .....      | .....AG    | .QSRDTARPE | A.DR..V..  | R.F.D.R... | ..D...PTV  | .S.S...TQ  | .....A.GH. | .EE.....   | .....      | .....      | .....    | ..... |
| Haplotype_8  | ..RAPDNLP  | PQ.RELSAA  | GQ...SARPO | ....GSQI   | G.F..R..E  | ..EA...V.  | ..SRP.TQ   | ....GA.G.. | --.ERAP..  | RT...S.TL  | .A.....    | .....    | ..... |
| Haplotype_9  | T.-SP....  | PAR.....   | .....      | .....      | .....      | .....      | .....      | .....      | .....      | .....      | .....      | .....    | ..... |
| Haplotype_10 | .....      | ..L..AG    | .QSRDTARPE | A.....     | .....R..E  | ..EA...V.  | ..SRP.TQ   | ....GA.G.. | --.ERAP..  | RT...S..L  | .A.....    | .....    | ..... |
| Haplotype_11 | .....      | ..L..AG    | .QSRDTARPE | A.DR..V..  | R.F.D.R... | ..D...PTV  | .S.S...TQ  | .....A.GH. | -.E.....   | .....      | .....      | .....    | ..... |
| Haplotype_14 | ..RAPDNLP  | PQ.RELSAA  | GQ...SAR.Q | ....GRQI   | G.F..R..E  | ..EA...V.  | ..SRP.TQ   | ....GA.G.. | --.ERAP..  | RT...S.TL  | .A.....    | .....    | ..... |
| Haplotype_16 | .....      | ..L..AG    | .QSRDTARPE | A.DR..V..  | R.F.D.R... | ..D...PTV  | .S.S...TQ  | .....A.GH. | -.E.....   | .....      | .....      | .....    | ..... |
| Haplotype_17 | T.-SP....  | PQ.RELSAA  | GQ...SARPO | ....GSQI   | G.F..R..E  | ..EA...V.  | ..SRP.TQ   | ....GA.G.. | --.ERAP..  | RT...S.TL  | .A.....    | .....    | ..... |
| Haplotype_18 | .....      | .....AG    | .QSRDTARPE | A.DR..V..  | R.F.D.R... | ..D...PTV  | .S.S...TQ  | .....A.GH. | -.E.....   | .....      | .....      | .....    | ..... |
| Haplotype_20 | .....      | ..L..AG    | .QSRDTARPE | A.DR..V..  | R.F.D.R... | ..D...PTV  | .S.S...TQ  | .....A.GH. | .EE.....   | .....      | .....      | .....    | ..... |
| Haplotype_22 | .....      | .....AG    | .QSRDTARPE | A.DR..V..  | R.F.D.R... | ..D...PTV  | .S.S...TQ  | .....A.GH. | .EE.....   | .....      | .....      | .....    | ..... |
| Haplotype_23 | .....      | .....      | .....      | .....      | .....      | .....      | .....      | .....      | --.....    | .....      | .....      | .....    | ..... |
|              | 265        |            |            |            |            |            |            |            |            |            |            |          | 381   |
| Haplotype_5  | YDEVLTTSDS | TKGIHVDPYH | SKYNTIRQKY | EYSMNPVEYE | IVKNLFNVGF | KNDGAASSDA | TPLVDVFKKA | LADETFQAEF | DNFVHGLYGF | AKRHNYLSEA | RMKDADRYTN | LLKNAIS  |       |
| Haplotype_7  | .....      | .....      | .....      | .....      | .....      | .....      | .....      | .....      | .....      | .....      | .....      | .....    | ..... |
| Haplotype_8  | .....      | .....      | .....      | .....      | .....      | .....      | .....      | .....      | .....      | .....      | .....      | .....    | ..... |
| Haplotype_9  | .....      | .....      | .....      | .....      | .....      | .....      | .....      | .....      | .....      | .....      | .....      | .....    | ..... |
| Haplotype_10 | .....      | .....      | .....      | .....      | .....      | .....      | .....      | .....      | .....      | .....      | .....      | .....    | ..... |
| Haplotype_11 | .....      | .....      | .....      | .....      | .....      | .....      | .....      | .....      | .....      | .....      | .....      | .....    | ..... |
| Haplotype_14 | .....      | .....      | .....      | .....      | .....      | .....      | .....      | .....      | .....      | .....      | .....      | .....    | ..... |
| Haplotype_16 | .....      | .....      | .....      | .....      | .....      | .....      | .....      | .....      | .....      | .....      | .....      | .....    | ..... |
| Haplotype_17 | .....      | .....      | .....      | .....      | .....      | .....      | .....      | .....      | .....      | .....      | .....      | .....    | ..... |
| Haplotype_18 | .....      | .....      | .....      | .....      | .....      | .....      | .....      | .....      | .....      | .....      | .....      | .....    | ..... |
| Haplotype_20 | .....      | .....      | .....      | .....      | .....      | .....      | .....      | .....      | .....      | .....      | .....      | .....    | ..... |
| Haplotype_22 | .....      | .....      | .....      | .....      | .....      | .....      | .....      | .....      | .....      | .....      | .....      | .....    | ..... |
| Haplotype_23 | .....      | ..N.S..... | .....      | .....      | .....      | .....      | .....      | .....      | .....      | .....      | .....      | .....    | ..... |

The alignment shows the 13 haplotypes at protein level found in *pvmsp-7E*. Dots represent amino acid identity.
