# Supplementary material for: Heterogeneous genetic diversity pattern in Plasmodium vivax genes encoding merozoite surface proteins (MSP) -7E, −7F and -7L
Source: PubMed Central journal article supplement (PMC4300842; doi:10.1186/1475-2875-13-495), 2014-12-13
Supplement: 12936_2014_3635_MOESM6_ESM.pdf [file 12936_2014_3635_MOESM6_ESM.pdf]

**Heterogeneous genetic diversity pattern in *Plasmodium vivax* genes encoding merozoite surface proteins (MSP) -7E, -7F and -7L**

**Additional file 6 Neutrality, linkage disequilibrium and recombination tests at the 5'-end, central region and 3'-end for *pvmsp-7* genes in the Colombian population.**

|                | n  | Gene    | Tajima D | Fu & Li D* | Fu & Li F* | Fay & Wu H | Fu Fs   | K-test | H-test (sd)    | Z <sub>ns</sub> | ZZ     | RM |
|----------------|----|---------|----------|------------|------------|------------|---------|--------|----------------|-----------------|--------|----|
| <i>mmsp-7E</i> |    | 5'-end  | 0,7753   | 1,5845•    | 1,5597     | -1,3741    | 7,723•  | 4*     | 0.331 (0.02) * | 0,876*          | 0,036  | 1  |
|                | 31 | central | 2,0870*  | 1,7901•    | 2,2375•    | -18,086    | 20,896• | 9*     | 0.855 (0.02) * | 0,317*          | 0,293* | 6  |
|                |    | 3'-end  | 0,1114   | 0,8811     | 0,7404     | -31,542*   | 1,255   | 14     | 0.872 (0.03)   | 0,304*          | 0,507* | 4  |
| <i>mmsp-7F</i> |    | 5'-end  | nd       | nd         | nd         | nd         | nd      | 1      | 0.000          | nd              | nd     | nd |
|                | 36 | central | 0,69854  | 0,57433    | 0,70231    | 0.000      | 1,099   | 2      | 0.346 (0.07)   | nd              | nd     | 0  |
|                |    | 3'-end  | 1,4254   | 0,57433    | 0,93746    | -0,365     | 1,642   | 2      | 0.461 (0.04)   | nd              | nd     | 0  |
| <i>mmsp-7L</i> |    | 5'-end  | nd       | nd         | nd         | nd         | nd      | 1      | 0.000          | nd              | nd     | nd |
|                | 31 | central | -0,5820  | 0,8019     | 0,47341    | 0,31398    | -0,56   | 3      | 0.329 (0.09)   | 0,0102          | 0.000  | 0  |
|                |    | 3'-end  | -0,3903  | 0,8019     | 0,53615    | 0,34194    | -0,33   | 3      | 0.370 (0.09)   | 0,0133          | 0.000  | 0  |

5'-end (*pvmsp-7E*: nucleotide 1–390, *pvmsp-7F*: nucleotide 1–432, *pvmsp-7L*: nucleotide 1–381), central (*pvmsp-7E*: nucleotide 391–747, *pvmsp-7F*: nucleotide 433–1,053, *pvmsp-7L*: nucleotide 382–816) and 3'-end (*pvmsp-7E*: nucleotide 748–1,158, *pvmsp-7F*: nucleotide 1,054–1,449, *pvmsp-7L*: nucleotide 817–1,275). Numbers based on Additional files 4, 9 and 10. •: p < 0.02, \*: p < 0.05.
