# Supplementary material for: Heterogeneous genetic diversity pattern in Plasmodium vivax genes encoding merozoite surface proteins (MSP) -7E, −7F and -7L
Source: PubMed Central journal article supplement (PMC4300842; doi:10.1186/1475-2875-13-495), 2014-12-13
Supplement: 12936_2014_3635_MOESM8_ESM.pdf [file 12936_2014_3635_MOESM8_ESM.pdf]

**Heterogeneous genetic diversity pattern in *Plasmodium vivax* genes encoding merozoite surface proteins (MSP) -7E, -7F and -7L**

**Additional file 8 Intra-species positively and negatively selected sites detected for *pvmsp-7* genes.**

| Positively selected sites |                                               |                                                 |                                                                                        |
|---------------------------|-----------------------------------------------|-------------------------------------------------|----------------------------------------------------------------------------------------|
| Gene                      | 5'-end                                        | central                                         | 3'-end                                                                                 |
| <i>m</i> sp-7E            | -                                             | 132, 147,<br>151, 164,<br>171, 178,<br>200, 239 | 369                                                                                    |
| <i>m</i> sp-7F            | -                                             | -                                               | 424                                                                                    |
| <i>m</i> sp-7L            | -                                             | 159, 260                                        | 357                                                                                    |
| Negatively selected sites |                                               |                                                 |                                                                                        |
| Gene                      | 5'-end                                        | central                                         | 3'-end                                                                                 |
| <i>m</i> sp-7E            | 46, 48, 52,<br>56, 63, 64,<br>72, 100,<br>127 | 149, 236,<br>245                                | 252, 261,<br>262, 263,<br>264, 273,<br>282, 302,<br>309, 357,<br>358, 368,<br>377, 379 |
| <i>m</i> sp-7F            | -                                             | -                                               | -                                                                                      |
| <i>m</i> sp-7L            | -                                             | -                                               | -                                                                                      |

5'-end (*pvmsp-7E*: nucleotide 1–390, *pvmsp-7F*: nucleotide 1–432, *pvmsp-7L*: nucleotide 1–381), central (*pvmsp-7E*: nucleotide 391–747, *pvmsp-7F*: nucleotide 433–1,053, *pvmsp-7L*: nucleotide 382–816) and 3'-end (*pvmsp-7E*: nucleotide 748–1,158, *pvmsp-7F*: nucleotide 1,054–1,449, *pvmsp-7L*: nucleotide 817–1,275). Numbers based on Additional files 4, 9 and 10.
