# Supplementary material for: Heterogeneous genetic diversity pattern in Plasmodium vivax genes encoding merozoite surface proteins (MSP) -7E, −7F and -7L
Source: PubMed Central journal article supplement (PMC4300842; doi:10.1186/1475-2875-13-495), 2014-12-13
Supplement: 12936_2014_3635_MOESM10_ESM.pdf [file 12936_2014_3635_MOESM10_ESM.pdf]

```

841
#Haplotype_1 AAA CAT ATG AGC AGC TTC CTA AAT GGC CTC TTA ACC AAT CAA AGC AAT AAC AAA AAG GAA ATA --- TTT TTC CAC CCA TAT TAT GGC CCC TAT TTT AAC CAC GGC GGG TAC TAT AAC TAT
#Haplotype_2 ... ..
#Haplotype_3 ... ..
#Haplotype_4 ... ..
#Haplotype_5 ... ..
#Haplotype_6 ... ..
#Haplotype_7 ... ..
#P_cynomolgi ...C ...A. C... ..G... ..A .A ...-.. ..G --T A... ..T ...T CA. .CA ...
961
#Haplotype_1 GAC CCC TAT TAT AAT TAT GCC CCA GCG TAC AAC CCA TTT GTG AGC CAA GCA AGG GAT TAC GAA GTG ATT AAA AAG TTG CTT GAT GCC TGC TTT AAC AAA GGG GAA GGA GCC GAT CCA AAT
#Haplotype_2 ... ..
#Haplotype_3 ... ..
#Haplotype_4 ... ..
#Haplotype_5 ... ..
#Haplotype_6 ... ..
#Haplotype_7 ... ..
#P_cynomolgi T... ..C... .G .T. ...T ...A... .C... A... .A... ..G... ..A... A... ..T... ..
1080
#Haplotype_1 GTG CCC TGC ATA ATT GAC ATA TTC AAA AAA GTG CTA GAC GAC GAA CGG TTT CGA AAC GAA CTA AAA ACT TTT ATG TAT GAC CTT TAC GAA TTT TTG AAA AAG AAT GAC GTC TTA AGT GAT
#Haplotype_2 ... ..
#Haplotype_3 ... ..
#Haplotype_4 ... ..
#Haplotype_5 ... ..
#Haplotype_6 ... ..
#Haplotype_7 ... ..
#P_cynomolgi ..A ... ..T... ..T... ..G... ..T..T ...C... ..A... ..GCC ...
1200
#Haplotype_1 GAT GAA AAG AAA AAC GAG TTG ATG AGA TTT TTC TTT GAC AAT GCC TTT CAG TTG GTC AAC CCG ATG TTT TAC TAC
#Haplotype_2 ... ..
#Haplotype_3 ... ..
#Haplotype_4 ... ..
#Haplotype_5 ... ..
#Haplotype_6 ... ..
#Haplotype_7 ... ..
#P_cynomolgi .GC .G. .G... ..A... ..A... ..C... ..C... .G... ..A... ..A... ..G C... ..
1275

```

The alignment shows the 7 haplotypes found in *pvmsp-7L* together with *pcmsp-7L* haplotype. Haplotype 1, Sal-I; Haplotype 2, Brazil-I, India-VII and North Korea; Haplotype 3, Mauritania-I; Haplotypes 4-7, Colombian isolates. The dots represent nucleotide identity. Codons under positive selection are shown in green (intra-species) and in turquoise (inter-species) and those under negative selection are shown in fuchsia (inter-species).
