# Supplementary material for: Heterogeneous genetic diversity pattern in Plasmodium vivax genes encoding merozoite surface proteins (MSP) -7E, −7F and -7L
Source: PubMed Central journal article supplement (PMC4300842; doi:10.1186/1475-2875-13-495), 2014-12-13
Supplement: 12936_2014_3635_MOESM11_ESM.pdf [file 12936_2014_3635_MOESM11_ESM.pdf]

**Heterogeneous genetic diversity pattern in *Plasmodium vivax* genes encoding merozoite surface proteins (-7E, -7F and -7L)**

**Additional file 11 Inter-species positively and negatively selected sites detected for *pvmsp-7* genes.**

| Positively selected sites |                                                                                                                                |                                                                                                                                   |                                                                                                                                                                                 |
|---------------------------|--------------------------------------------------------------------------------------------------------------------------------|-----------------------------------------------------------------------------------------------------------------------------------|---------------------------------------------------------------------------------------------------------------------------------------------------------------------------------|
| Gene                      | 5' end                                                                                                                         | central                                                                                                                           | 3' end                                                                                                                                                                          |
| <i>mmsp-7E</i>            | -                                                                                                                              | 132, 133, 135,<br>136, 147, 151,<br>154, 161, 162,<br>164, 165, 169,<br>171, 172, 176,<br>178, 195, 200,<br>203, 211, 217,<br>239 | 319, 323, 371                                                                                                                                                                   |
| <i>mmsp-7F</i>            | 6                                                                                                                              | 212, 295                                                                                                                          | 424                                                                                                                                                                             |
| <i>mmsp-7L</i>            | 11, 49                                                                                                                         | 159, 246, 247,<br>260                                                                                                             | 357                                                                                                                                                                             |
| Negatively selected sites |                                                                                                                                |                                                                                                                                   |                                                                                                                                                                                 |
| Gene                      | 5' end                                                                                                                         | central                                                                                                                           | 3' end                                                                                                                                                                          |
| <i>mmsp-7E</i>            | 28, 39, 46,<br>48, 49, 52,<br>53, 56, 63,<br>64, 69, 72,<br>84, 88, 93,<br>96, 100, 104,<br>109, 110,<br>115, 118,<br>119, 127 | 156, 236, 245                                                                                                                     | 252, 262, 263,<br>264, 272, 282,<br>283, 294, 300,<br>302, 303, 309,<br>311, 321, 327,<br>337, 338, 343,<br>349, 352, 356,<br>357, 358, 360,<br>361, 365, 366,<br>368, 377, 379 |
| <i>mmsp-7F</i>            | 2, 7, 34, 38,<br>46, 104, 109                                                                                                  | 149, 168, 183,<br>195, 204, 207,<br>289, 298, 300,<br>325                                                                         | 384, 401, 406,<br>421, 449, 463,<br>471                                                                                                                                         |
| <i>mmsp-7L</i>            | 25, 42, 48,<br>59, 72, 74,<br>79, 83, 117,<br>118                                                                              | 138, 175, 180,<br>186, 191, 195,<br>210, 211, 215,<br>236, 242, 244,<br>245                                                       | 273, 274, 279,<br>280, 282, 305,<br>314, 330, 345,<br>381, 384, 406,<br>410                                                                                                     |

5'-end (*pvmsp-7E*: nucleotide 1–390, *pvmsp-7F*: nucleotide 1–432, *pvmsp-7L*: nucleotide 1–381), central (*pvmsp-7E*: nucleotide 391–747, *pvmsp-7F*: nucleotide 433–1,053, *pvmsp-7L*: nucleotide 382–816) and 3'-end (*pvmsp-7E*: nucleotide 748–1,158, *pvmsp-7F*: nucleotide 1,054–1,449, *pvmsp-7L*: nucleotide 817–1,275). Numbers based on Additional files 4, 9 and 10.
