# Supplementary material for: Heterogeneous genetic diversity pattern in Plasmodium vivax genes encoding merozoite surface proteins (MSP) -7E, −7F and -7L
Source: PubMed Central journal article supplement (PMC4300842; doi:10.1186/1475-2875-13-495), 2014-12-13
Supplement: 12936_2014_3635_MOESM12_ESM.pdf [file 12936_2014_3635_MOESM12_ESM.pdf]

**Additional file 12 *pcmsp-7L* putative donor and acceptor sites.**

|                               |             |                |                   |               |              |            |                         |             |
|-------------------------------|-------------|----------------|-------------------|---------------|--------------|------------|-------------------------|-------------|
|                               | *           | 20             | *                 | 40            | *            | 60         | *                       |             |
| Sal-I_pvm <sub>sp</sub> -7L : | ATGAAAAC    | AAAAGTACTATTCT | TCTTGCCGT         | CCATTTTGC     | TGCTACCACATT | CGGTATGGTC | CAGAAACGAAAGGTC         | : 76        |
| Pc <sub>msp</sub> -7L_DNA :   | ATGAAAAT    | AAAAGTACTATTCA | TCTTGCCACC        | CATTTTGT      | TGCTACCACATT | CGGTATGGTC | CAGAAACGAAAGGTC         | : 76        |
| Pc <sub>msp</sub> -7L_mRNA :  | ATGAAAAT    | AAAAGTACTATTCA | TCTTGCCACC        | CATTTTGT      | TGCTACCACATT | CGGTATGGTC | CAGAAACGAAAGGTC         | : 76        |
|                               |             |                |                   |               |              |            |                         |             |
|                               | 80          | *              | 100               | *             | 120          | *          | 140                     | *           |
| Sal-I_pvm <sub>sp</sub> -7L : | CATCTGGGCC  | CCCCCAAATA     | AGAAGCT           | TAAATGCTAACG  | CACTACATTTCT | TAAGG      | GGCAAATTAGAGTTA         | CTAAA : 152 |
| Pc <sub>msp</sub> -7L_DNA :   | CACCTGGGCC  | CCCCAAAAC      | TGAGAT            | GCCAAATGCTAAC | CACTACATTTCT | TAAAA      | GGCAAATTAGAACAC         | CTAAA : 152 |
| Pc <sub>msp</sub> -7L_mRNA :  | CACCTGGGCC  | CCCCAAAAC      | TGAGAT            | GCCAAATGCTAAC | CACTACATTTCT | TAAAA      | GGCAAATTAGAACAC         | CTAAA : 152 |
|                               |             |                |                   |               |              |            |                         |             |
|                               | 160         | *              | 180               | *             | 200          | *          | 220                     |             |
| Sal-I_pvm <sub>sp</sub> -7L : | TAAATCAGCG  | AGGAGCAGGT     | AGTTTCTCCAGATTTT  | TAAAAAAACG    | TAGAACTGCT   | GAAAAAG    | AAAATTGAGGAA            | : 228       |
| Pc <sub>msp</sub> -7L_DNA :   | TAAATCAGCA  | AAGAGAAT       | GCAGTATCTCCAGATTT | TAAAAAAAC     | ATAGAACTGCT  | TAAAAAA    | AAAATCGAGGAA            | : 228       |
| Pc <sub>msp</sub> -7L_mRNA :  | TAAATCAGCA  | AAGAGAAT       | GCAGTATCTCCAGATTT | TAAAAAAAC     | ATAGAACTGCT  | TAAAAAA    | AAAATCGAGGAA            | : 228       |
|                               |             |                |                   |               |              |            |                         |             |
|                               | *           | 240            | *                 | 260           | *            | 280        | *                       | 300         |
| Sal-I_pvm <sub>sp</sub> -7L : | CTACAGGGT   | AAGGCAGAAAAG   | GATAAAAGTAAAAC    | GGATGGGGG     | AGGATACCAC   | ACCCAAGG   | AACAGCAAGAAGATC         | : 304       |
| Pc <sub>msp</sub> -7L_DNA :   | CTAGAAGGG   | AAGGCAGAAAA    | GATAAAC           | -----         | GGATGGGGT    | GGATACTAT  | ACCCAGTGGACAGCAAGCATGTG | : 298       |
| Pc <sub>msp</sub> -7L_mRNA :  | CTAGAAGGG   | AAGGCAGAAAA    | GATAAAC           | -----         | GGATGGGGT    | GGATACTAT  | ACCCAGTGGACAGCAAGCATGTG | : 298       |
|                               |             |                |                   |               |              |            |                         |             |
|                               | *           | 320            | *                 | 340           | *            | 360        | *                       | 380         |
| Sal-I_pvm <sub>sp</sub> -7L : | AAAATGTGAGT | CAAAACGGATT    | GGAAGAGCAGGCC     | CCAAGTGACAGT  | AACGAGGGAG   | AAGCGC     | CAGGAAGAAAACAC          | : 380       |
| Pc <sub>msp</sub> -7L_DNA :   | AAAATGTGAGT | CAAAACGGATT    | TGAAGAGAAGAC      | CCATGTGGCAGCA | ATGAGGGAAA   | AAGCGG     | CAGGAAGAAAAC            | : 374       |
| Pc <sub>msp</sub> -7L_mRNA :  | AAAATGTGAGT | CAAAACGGATT    | TGAAGAGAAGAC      | CCATGTGGCAGCA | ATGAGGGAAA   | AAGCGG     | CAGGAAGAAAAC            | : 374       |
|                               |             |                |                   |               |              |            |                         |             |
|                               | *           | 400            | *                 | 420           | *            | 440        | *                       |             |
| Sal-I_pvm <sub>sp</sub> -7L : | TCAAGTCAAAA | ATGTCATTTTTT   | TACGGAGA          | AGGAAGAAGCGG  | TAGATGAAGAAG | CTGAAAA    | AGAACACCGCTGTC          | : 456       |
| Pc <sub>msp</sub> -7L_DNA :   | TCAAGTCAAAA | ATGTCATTTTTT   | TATGAAAA          | AGGAGAAAGCGAT | CGATGAAGAAG  | TGGGAAC    | AAAGAACACCGCTATC        | : 450       |
| Pc <sub>msp</sub> -7L_mRNA :  | TCAAGTCAAAA | ATGTCATTTTTT   | TATGAAAA          | AGGAGAAAGCGAT | CGATGAAGAAG  | TGGGAAC    | AAAGAACACCGCTATC        | : 450       |

Sal-I\_pvmsp-7L : **ATAAGT**460**GAAAAGGC**\***GAAATTT**480**CCAAATGAGGAATCGC**\***AAGGAAATGATGA**500**AACGC**\***AACGCAGGAGAGC**520**CATCGAGG**\* : 532  
 Pcmsp-7L\_DNA : **ATAACT**GAAAAG**GAAGAAATTG**CCAAAT**TGAGGAATCGC**CGGGAAT**GGATGG**AACGCAGG**CGAAGGAGAGT**ATCGAGG : 526  
 Pcmsp-7L\_mRNA : **ATAACT**GAAAAG**GAAGAAATTG**CCAAAT**TGAGGAATCGC**CGGGAAT**GGATGG**AACGCAGG**CGAAGGAGAGT**ATCGAGG : 526

Sal-I\_pvmsp-7L : **GAGAAGC**540**TTCT**\***CCCCGGAGTTG**560**TAGTCGACG**\***GAGACAGATGACT**580**CACCAGAAGGC**\***GAACCCCTATCCGGATT**600**TGGAAAC** : 608  
 Pcmsp-7L\_DNA : **GAGAAGC**GT**TACCCCGGAGTTA**TAGT**GGACAAGACAGGTGAT**T**CACCAAGGG**GAGAAAT**CCTATCCGGAT**CGGAAAC : 602  
 Pcmsp-7L\_mRNA : **GAGAAGC**GT**TACCCCGGAGTTA**TAGT**GGACAAGACAGGTGAT**T**CACCAAGGG**GAGAAAT**CCTATCCGGAT**CGGAAAC : 602

Sal-I\_pvmsp-7L : **GGAAGG**\***CAATT**620**CTTCAGCTGAG**\***GAGTGCC**640**CCAAATGAG**\***CCGGACG**660**TTAACACCACACATA**\***CGGCAGT**680**TAGATACGCAC** : 684  
 Pcmsp-7L\_DNA : **GGAAGG**TAAGC**CTTCAGCTGA**AAGCA**CTCCAAATGA**ACCGA**ATGTTAACAT**CATACATATAC**CAGCACACACAGAC** : 678  
 Pcmsp-7L\_mRNA : **GGAAGG**----- : 607

Sal-I\_pvmsp-7L : **ATGCCAG**\***CAGATG**700**CGAACATAGGAGT**\***AGACACAAATATG**720**CATTTG**\***ACACA**740**CCTCCC**\***CACCCAAGCGGCGA**760**AAAACC** : 760  
 Pcmsp-7L\_DNA : **TCAGGCACACACAC**ACTCAGATAC**AAACACAGAC**AAAC-----**ACACAGACACA**CACCCAAGCGGCG**GAAGTC** : 748  
 Pcmsp-7L\_mRNA : ----- : -

Sal-I\_pvmsp-7L : **CCGGCGC**\***ACCCCAAG**780**AGACGC**\***ACCCTTCCCT**800**CCATTGAC**\***GAAAATGCA**820**AATAGAAGAGCA**\***TCACG**840**AATGAAACATAT**\* : 836  
 Pcmsp-7L\_DNA : **CCAGCGCACCCCAAA**AAGAC**ACCCTTTC**CA**CCATTTACA**AAAAT**GTAAAC**CAGAAGAG**CGTCAAGAACT**AAAC**CACAT** : 824  
 Pcmsp-7L\_mRNA : ----- : -

Sal-I\_pvmsp-7L : **GAGC**840**AGCTT**\***CCTAAATGGC**860**CTCTTAACCAATCAAAGCA**\***ATAAC**880**AAAAAGGAAATAT**\***TTTTCCAC**900**CCATATTATGGC**\* : 912  
 Pcmsp-7L\_DNA : **GAACC**CGCTT**CCTAG**ATGGC**CTCTTAACCAATCAAAGCA**-----**AAAAAAAGGAAATG**TA**TTTTCCAT**CCATATTATGGC : 898  
 Pcmsp-7L\_mRNA : ----- : -

```

          920          *          940          *          960          *          980
Sal-I_pvmsp-7L : CCCTATTTTAACCA CGGCGGG TACTATAACTATG ACCCCTATTATAATTATG CCCCAGC GTACAACCCATT TGTGA : 988
Pcmsp-7L_DNA   : CCCTATTTTAACCA TCACGCA TACTATAACTATT ACCCCTATTATAATTATC CCCC GGTGTATTAACCCATA TGTGA : 974
Pcmsp-7L_mRNA  : ----- : -

          *          1000          *          1020          *          1040          *          1060
Sal-I_pvmsp-7L : GCCAAGCAAGGGATTACGAAGTGA TTA AAAA GTTGCTTGATGCT TGCTTTAACAAAG GGAAGGAGCCGATCCAAA : 1064
Pcmsp-7L_DNA   : CCAAACAAAGGATTACGAAGTGG TTA AAAA ATTGATTGATGCT TGCTTTAACAAAG GGAAGGAGCCGATCCAAA : 1050
Pcmsp-7L_mRNA  : ----- GGAAGGAGCCGATCCAAA : 626

          *          1080          *          1100          *          1120          *          1140
Sal-I_pvmsp-7L : TGTGCCCTGCATAATTGACAT TATTCAAAAAAGTGCTAGACGACGAACGGTTTCGAAACGAAC TAAAACTTTTATG : 1140
Pcmsp-7L_DNA   : TGTACCCTGCATAATTGACT TATTCAAAAAAGTGT TAGACGACGAAGGGTTTCGAAACGAAT TAAAACTTTTCATG : 1126
Pcmsp-7L_mRNA  : TGTACCCTGCATAATTGACT TATTCAAAAAAGTGT TAGACGACGAAGGGTTTCGAAACGAAT TAAAACTTTTCATG : 702

          *          1160          *          1180          *          1200          *
Sal-I_pvmsp-7L : TATGACCTTTACGAATTTT TGA AAAA GAATGACGTCTTAAGTGATGATG AAAAA GAAAAACGAGTTGATGAGATTTT : 1216
Pcmsp-7L_DNA   : TATAACCTTTACGAATTTGCC AAAA GAATGACGTCTTAAGTGATGCGGGAAGGAAAAACGAATTGATGAAATTCT : 1202
Pcmsp-7L_mRNA  : TATAACCTTTACGAATTTGCC AAAA GAATGACGTCTTAAGTGATGCGGGAAGGAAAAACGAATTGATGAAATTCT : 778

          1220          *          1240          *          1260
Sal-I_pvmsp-7L : TCTTTGACAATGCCCTTTCAGTTGGTCAACCCGATGTTT TACTACTGA : 1263
Pcmsp-7L_DNA   : TCTTTGACAATGCCCTTTCAGTTGGTCAACACGATGTTGCACTACTGA : 1249
Pcmsp-7L_mRNA  : TCTTTGACAATGCCCTTTCAGTTGGTCAACACGATGTTGCACTACTGA : 825

```

An alignment was made between the Sal-I strain *pvm**sp*-7*L* sequences, *pcmsp*-7*L* and the sequence resulting from GeneScan analysis (*pcmsp*-7*L*\_mRNA). The red arrows indicate the putative donor and acceptor sites in *pcmsp*-7*L*.
